# Supplementary material for: Intravascular Imaging and Angiography Guidance in Complex Percutaneous Coronary Intervention Among Patients With Diabetes: A Secondary Analysis of a Randomized Clinical Trial
Source: PubMed Central journal article supplement — JAMA Netw Open. 2024 Jun 24;7(6):e2417613. doi: 10.1001/jamanetworkopen.2024.17613 (PMC11197449; doi:10.1001/jamanetworkopen.2024.17613), 2024-06-24
Supplement: jamanetwopen-e2417613-s003.pdf [file jamanetwopen-e2417613-s003.pdf]

\*Indicates required information. Only first name, last name, and suffix will appear in PubMed.

| <b>*Group Name(s): RENOVATE-COMPLEX-PCI</b> |                   |                              |                         |                                                                                                     |                                                 |                                                                |                                                                                                   |
|---------------------------------------------|-------------------|------------------------------|-------------------------|-----------------------------------------------------------------------------------------------------|-------------------------------------------------|----------------------------------------------------------------|---------------------------------------------------------------------------------------------------|
| <b>*First Name and Middle Initial(s)</b>    | <b>*Last Name</b> | <b>*Suffix (eg, Jr, III)</b> | <b>Academic Degrees</b> | <b>Institution</b>                                                                                  | <b>Location (city, state/province, country)</b> | <b>Role or Contribution, eg, chair, principal investigator</b> | <b>Group (if more than 1 Group listed in the byline) and/or Subgroup (eg, Steering Committee)</b> |
| Hyun-Jong                                   | Lee               |                              | MD, PhD                 | Sejong General Hospital                                                                             | Bucheon, Korea                                  |                                                                | Clinical Event Adjudication Committee                                                             |
| Dong Ryul                                   | Ryu               |                              | MD, PhD                 | Kangwon National University Hospital, Kangwon National University School of Medicine                | Chuncheon, Korea                                |                                                                | Clinical Event Adjudication Committee                                                             |
| Kyu Tae                                     | Park              |                              | MD, PhD                 | Chuncheon Sacred Heart Hospital, Hallym University College of Medicine                              | Chuncheon, Korea                                |                                                                | Clinical Event Adjudication Committee                                                             |
| Kiyuk                                       | Chang             |                              | MD, PhD                 | Seoul St. Mary's Hospital, The Catholic University of Korea                                         | Seoul, Korea                                    |                                                                | Data Safety Monitoring Board                                                                      |
| Seonwoo                                     | Kim               |                              | PhD                     | Academic Research Service Headquarter, LSK Global PS                                                | Seoul, Korea                                    |                                                                | Data Safety Monitoring Board                                                                      |
| Dong-Yeon                                   | Kim               |                              | MD, PhD                 | Seoul Medical Center                                                                                | Seoul, Korea                                    |                                                                | Data Safety Monitoring Board                                                                      |
| Suyoun                                      | Shin              |                              | RN                      | Heart Vascular Stroke Institute, Samsung Medical Center, Sungkyunkwan University School of Medicine | Seoul, Korea                                    |                                                                | Data Coordination and Management                                                                  |
| Jinshil                                     | Kim               |                              | RN                      | Heart Vascular Stroke Institute, Samsung Medical Center, Sungkyunkwan University School of Medicine | Seoul, Korea                                    |                                                                | Data Coordination and Management                                                                  |
| Jaeyoung                                    | Park              |                              | RN                      | Heart Vascular Stroke Institute, Samsung Medical Center, Sungkyunkwan University School of Medicine | Seoul, Korea                                    |                                                                | Data Coordination and Management                                                                  |
| Seunghyun                                   | Lee               |                              | RN                      | Heart Vascular Stroke Institute, Samsung Medical Center, Sungkyunkwan University School of Medicine | Seoul, Korea                                    |                                                                | Data Coordination and Management                                                                  |

## Supplemental Online Content: Nonauthor Collaborators

\*Indicates required information. Only first name, last name, and suffix will appear in PubMed.

| <b>*First Name and Middle Initial(s)</b> | <b>*Last Name</b> | <b>*Suffix (eg, Jr, III)</b> | Academic Degrees | Institution                                                                                         | Location (city, state/province, country) | Role or Contribution, eg, chair, principal investigator | Group (if more than 1 Group listed in the byline) and/or Subgroup (eg, Steering Committee)           |
|------------------------------------------|-------------------|------------------------------|------------------|-----------------------------------------------------------------------------------------------------|------------------------------------------|---------------------------------------------------------|------------------------------------------------------------------------------------------------------|
| Euna                                     | Kim               |                              | RN               | Heart Vascular Stroke Institute, Samsung Medical Center, Sungkyunkwan University School of Medicine | Seoul, Korea                             |                                                         | Data Coordination and Management                                                                     |
| Hyein                                    | Kang              |                              | RT               | Heart Vascular Stroke Institute, Samsung Medical Center, Sungkyunkwan University School of Medicine | Seoul, Korea                             |                                                         | Data Coordination and Management, Angiography Core Laboratory, Intravascular Imaging Core Laboratory |
| Su Jin                                   | Hwang             |                              |                  | Heart Vascular Stroke Institute, Samsung Medical Center, Sungkyunkwan University School of Medicine | Seoul, Korea                             |                                                         | Data Coordination and Management                                                                     |
| Yeonhui                                  | Lee               |                              |                  | Heart Vascular Stroke Institute, Samsung Medical Center, Sungkyunkwan University School of Medicine | Seoul, Korea                             |                                                         | Data Coordination and Management                                                                     |
| Hyun Seung                               | Joh               |                              | MD               | Seoul National University Boramae Medical Center, Seoul National University College of Medicine     | Seoul, Korea                             |                                                         | Angiography Core Laboratory                                                                          |
| Se Young                                 | Im                |                              | RT               | Heart Vascular Stroke Institute, Samsung Medical Center, Sungkyunkwan University School of Medicine | Seoul, Korea                             |                                                         | Intravascular Imaging Core Laboratory                                                                |
