# Supplementary material for: Intravascular Imaging and Angiography Guidance in Complex Percutaneous Coronary Intervention Among Patients With Diabetes: A Secondary Analysis of a Randomized Clinical Trial
Source: PubMed Central journal article supplement — JAMA Netw Open. 2024 Jun 24;7(6):e2417613. doi: 10.1001/jamanetworkopen.2024.17613 (PMC11197449; doi:10.1001/jamanetworkopen.2024.17613), 2024-06-24
Supplement: jamanetwopen-e2417613-s004.pdf [file jamanetwopen-e2417613-s004.pdf]

## Data Sharing Statement

Choi. Intravascular Imaging and Angiography Guidance in Complex Percutaneous Coronary Intervention Among Patients With Diabetes. *JAMA Netw Open*. Published June 24, 2024. doi:10.1001/jamanetworkopen.2024.17613

### Data

**Data available:** No
